# Supplementary figures and images for: Photocurable modification of inorganic fillers and their application in photopolymers for 3D printing
Source: Royal Society of Chemistry journal article supplement (doi:10.1039/c9py01445d), 2019-01-01

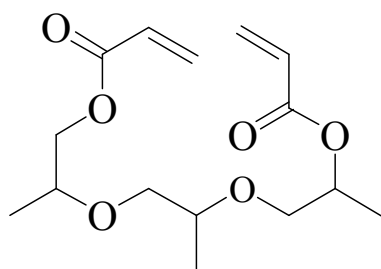

SI-1. Structure of TPGDA

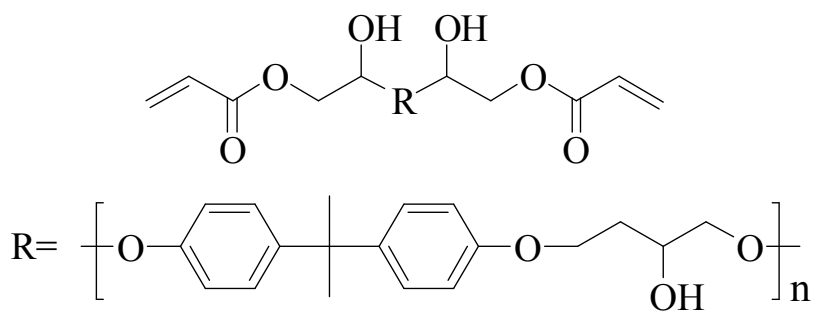

SI-2. Structure of EA

Supplement: c9py01445d1.pdf [file c9py01445d1.pdf]
